# Supplementary material for: Stepwise on-surface synthesis of thiophene-based polymeric ribbons by coupling reactions and the carbon–fluorine bond cleavage
Source: Royal Society of Chemistry journal article supplement (doi:10.1039/d1cp04039a), 2021-12-06
Supplement: d1cp04039a1.pdf [file d1cp04039a1.pdf]

## *Supporting Information*

# **Stepwise on-surface synthesis of thiophene-based polymeric ribbon by coupling reaction and carbon-fluorine bond cleavage**

Liqian Liu,<sup>a</sup> Hengqi Zou,<sup>a</sup> Xinrui Miao,<sup>a\*</sup> Hin-Lap Yip,<sup>a,b\*</sup> Wenli Deng<sup>a</sup> and Yong Cao<sup>a</sup>

<sup>†</sup>*Institute of Polymer Optoelectronic Materials and Devices, State Key Laboratory of Luminescent Materials and Devices, College of Materials Science and Engineering, South China University of Technology, Guangzhou 510640, P. R. China*

<sup>‡</sup>*Innovation Center of Printed Photovoltaics, South China Institute of Collaborative Innovation, Dongguan 523808, P. R. China*

### **Corresponding authors:**

\*Xinrui Miao (msxrmiao@scut.edu.cn); Hin-Lap Yip (msangusyip@scut.edu.cn)

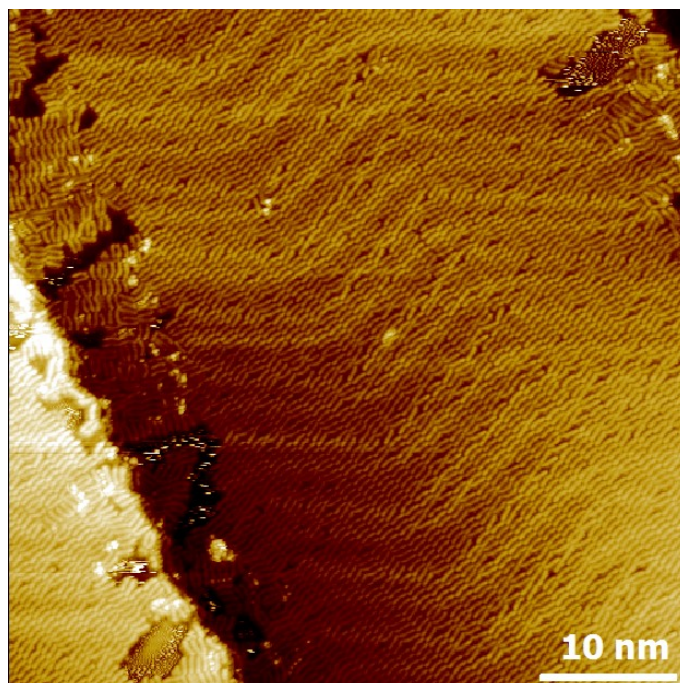

**Figure S1.** Large-scale STM image showing the self-assembly of FPT-Br precursor on Au(111) surface at room temperature.  $V_b = -500$  mV,  $I_t = 50$  pA.

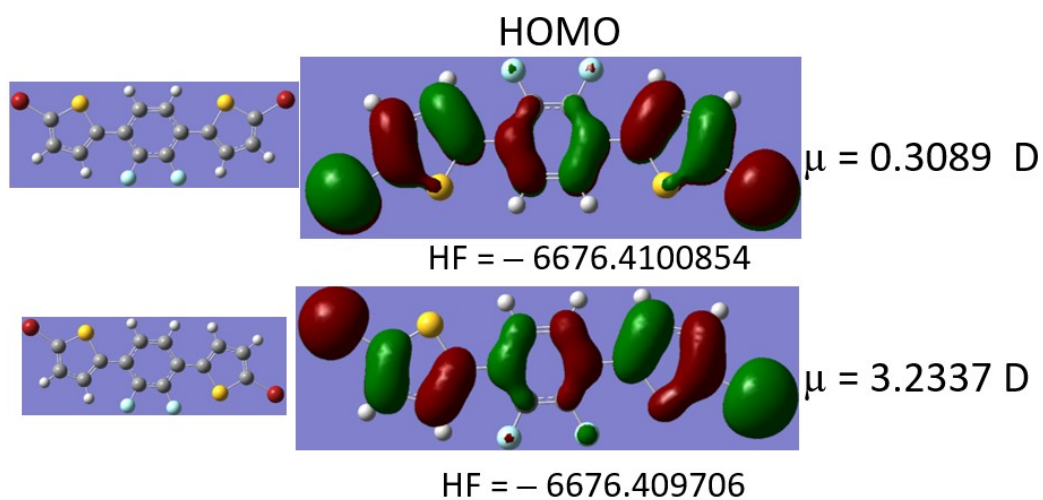

**Figure S2.** Optimized structure, HOMO, energy and dipole moment of FPT-Br with two conformations.

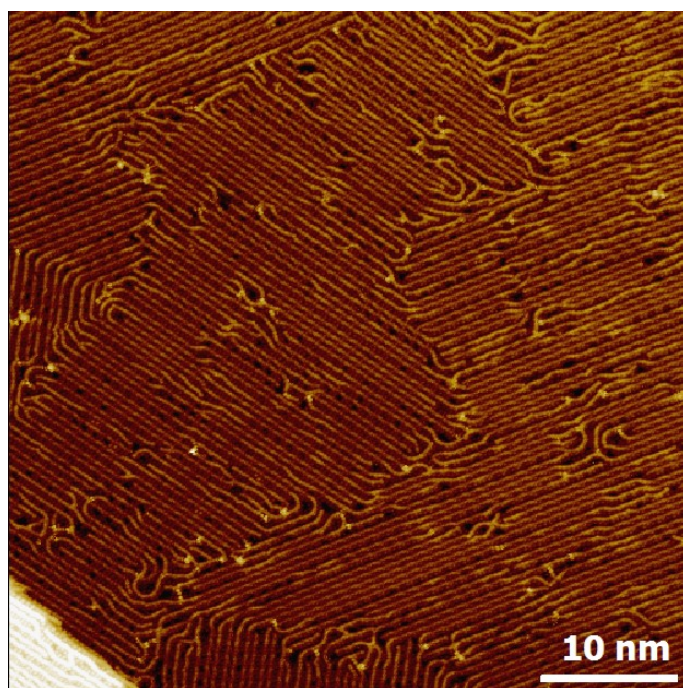

**Figure S3.** Large-scale STM image showing the formation of organometallic intermediate with C-Au-C bonds on the Au(111) surface after the above sample was annealing at 210 °C for 30 minutes .  $V_b = 600 \text{ mV}$ ,  $I_t = 400 \text{ pA}$ .



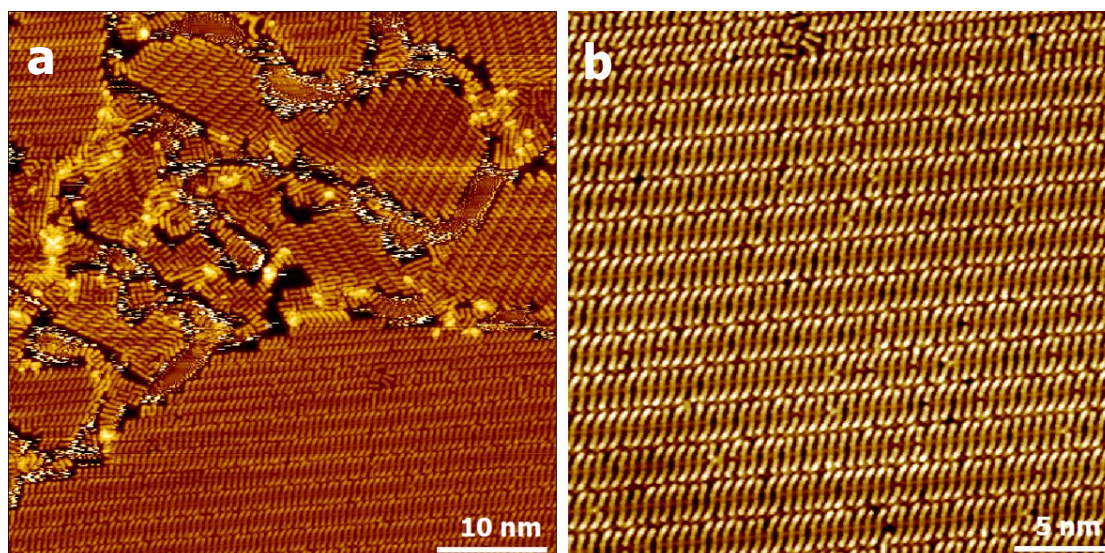

**Figure S4.** Large-scale and small-scale STM images of the organometallic intermediate after the sample was annealing at 40 °C for 2 hours.  $V_b = -300$  mV,  $I_t = 300$  pA.

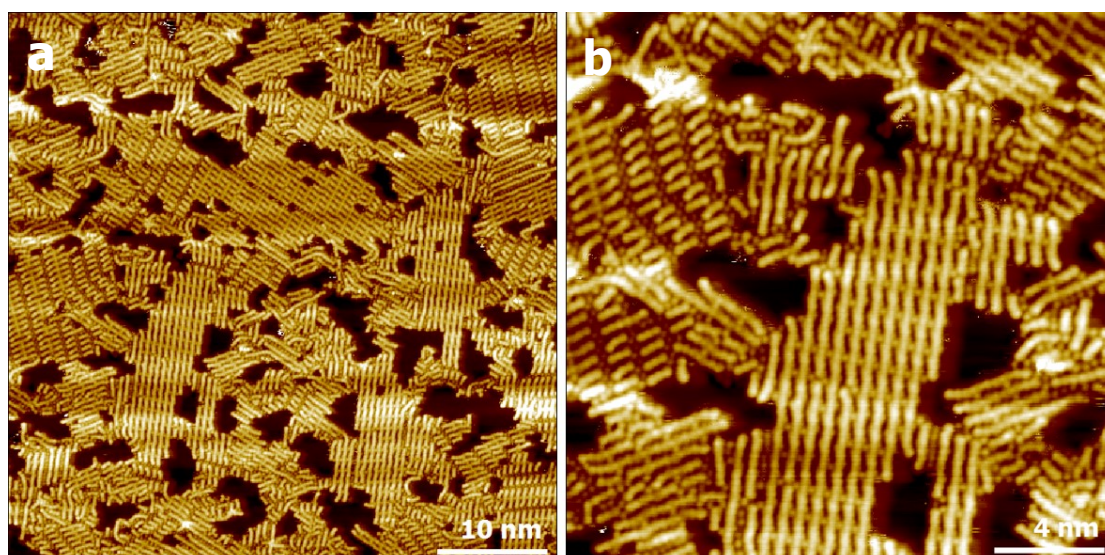

**Figure S5.** Large-scale and small-scale STM images of the organometallic intermediate after the sample was further annealing at 80 °C for 70 minutes and 130 °C for 90 minutes.  $V_b = -600$  mV,  $I_t = 300$  pA.



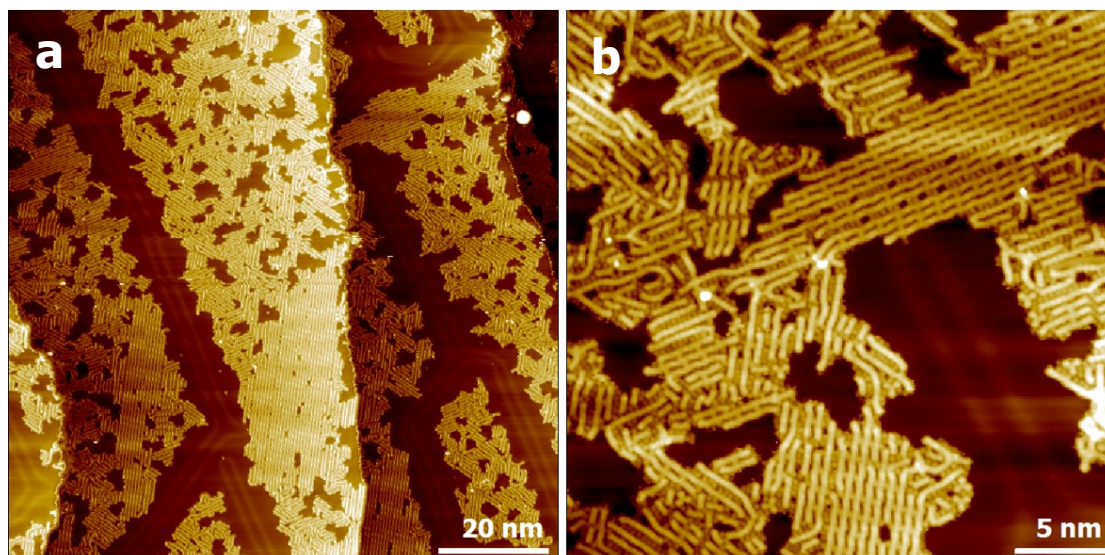

**Figure S6.** Large-scale and small-scale STM images of the organometallic intermediate after the sample was further annealing at 150 °C for 60 minutes.  $V_b = -600$  mV,  $I_t = 300$  pA.

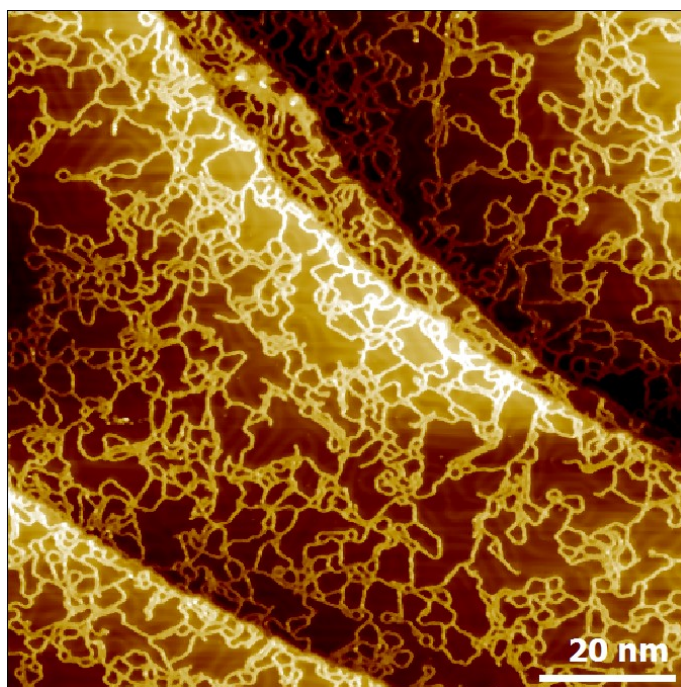

**Figure S7.** Large-scale STM image of the polymer after the sample was further annealing at 270 °C for 60 minutes.  $V_b = -600$  mV,  $I_t = 300$  pA.

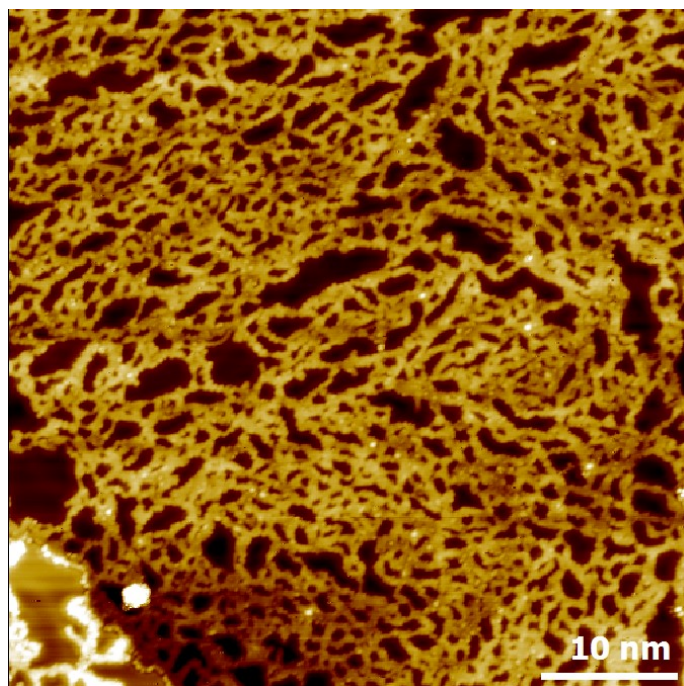

**Figure S8.** STM topographic image of Au(111) surface covered with polymeric ribbons after the sample was annealed at 390 °C for one hour.  $V_b = -600$  mV,  $I_t = 300$  pA.
